# Supplementary material
Source: PubMed Central journal article supplement (PMC1817621)

I

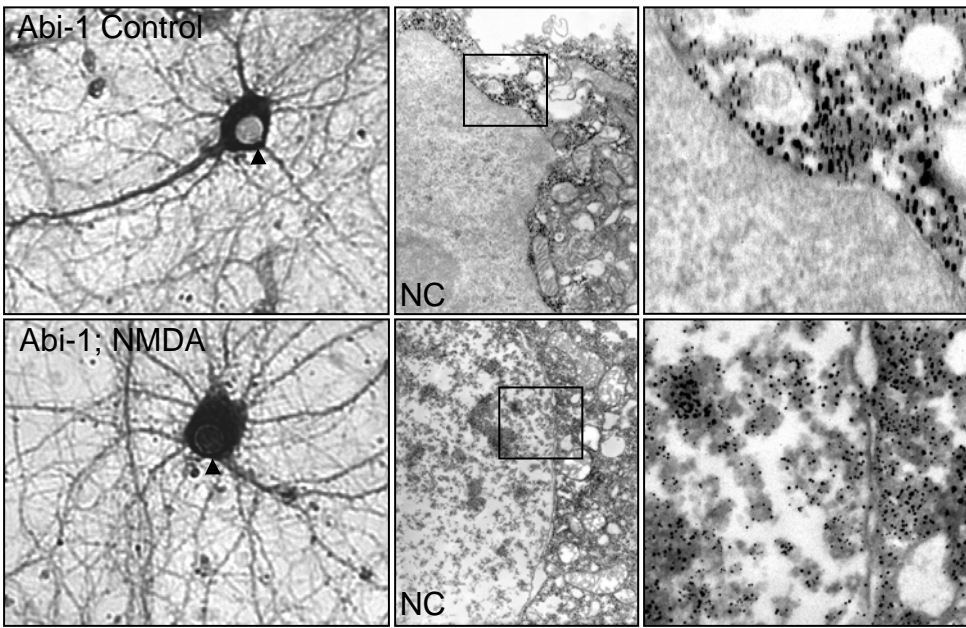

IIa

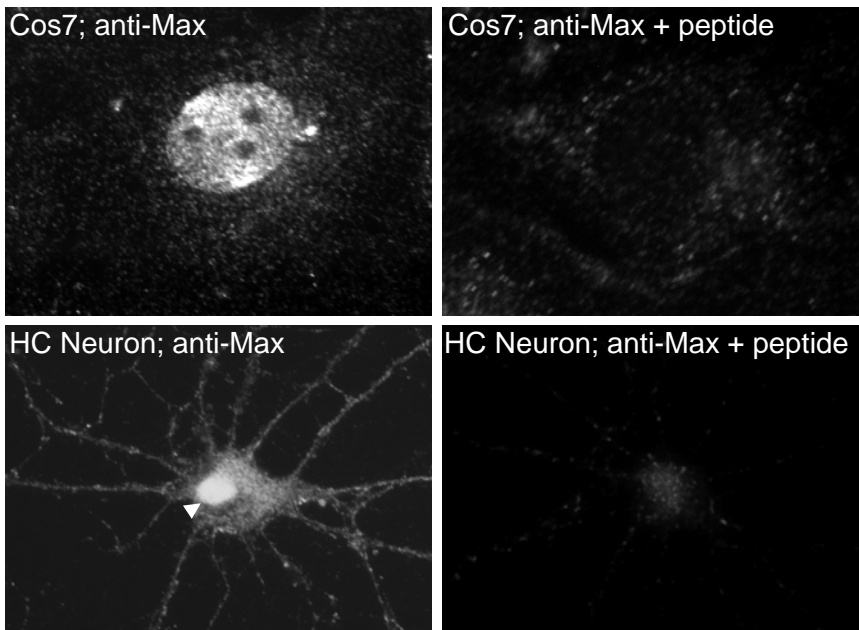

IIb

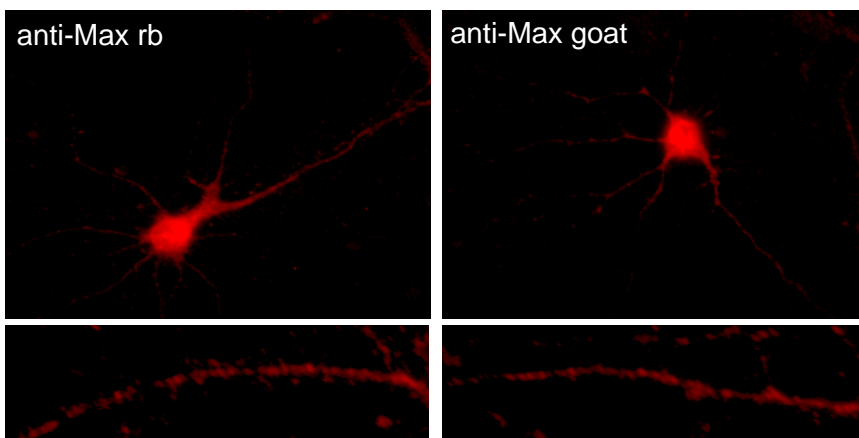

### IIIa

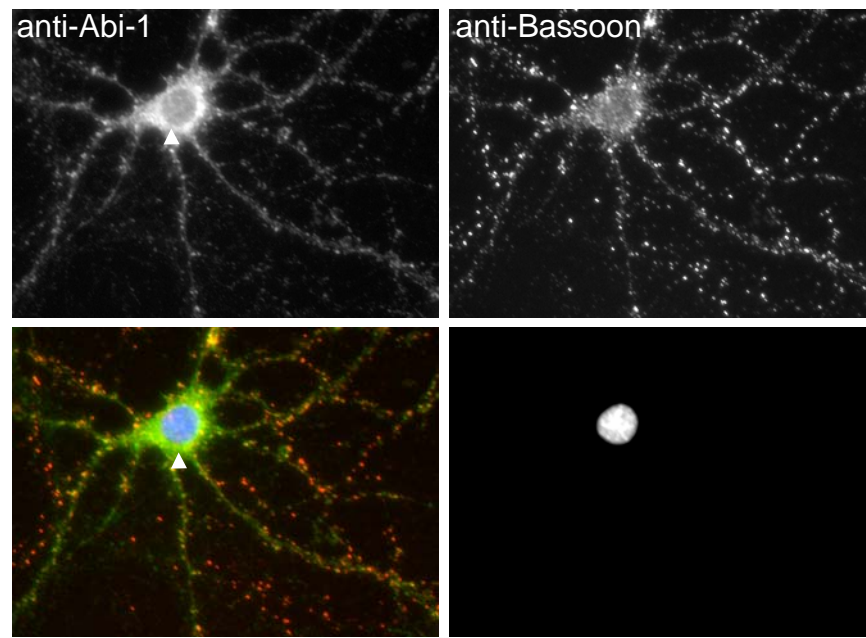

### IIIb

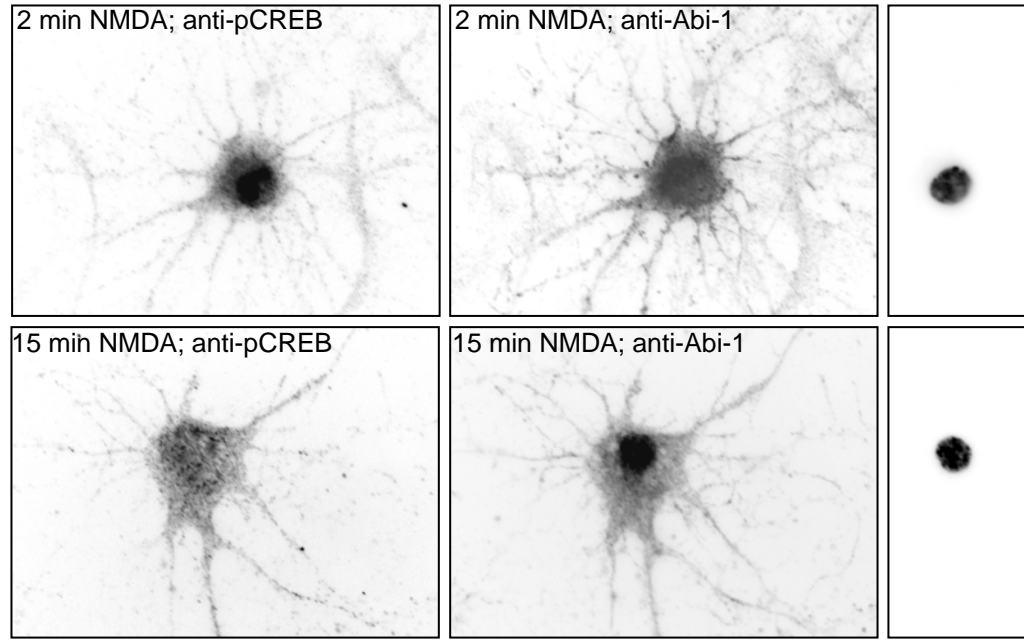

Supplement: 7601569s2.pdf [file 7601569s2.pdf]
